# Supplementary material for: Safety and Efficacy of Four Different Diagnostic Catheter Curves Dedicated to One-Catheter Technique of Transradial Coronaro-Angiography—Prospective, Randomized Pilot Study. TRACT 1: Trans RAdial CoronaryAngiography Trial 1
Source: MDPI journal article supplement (doi:10.3390/jcm10204722), 2021-10-14
Supplement: s1 [file s1]

## Supplementary Materials

**Table S1.** Ostial stability assessment among investigated groups ( $p < 0.001$ ).

| Group number | Stability |         |            |                              | Total   |
|--------------|-----------|---------|------------|------------------------------|---------|
|              |           | Optimal | Suboptimal | Necessity to change catheter |         |
| 1.           | Observed  | 8       | 9          | 3                            | 20      |
|              | % in row  | 40.0 %  | 45.0 %     | 15.0 %                       | 100.0 % |
| 2.           | Observed  | 18      | 2          | 0                            | 20      |
|              | % in row  | 90.0 %  | 10.0 %     | 0.0 %                        | 100.0 % |
| 3.           | Observed  | 15      | 1          | 4                            | 20      |
|              | % in row  | 75.0 %  | 5.0 %      | 20.0 %                       | 100.0 % |
| 4.           | Observed  | 13      | 2          | 5                            | 20      |
|              | % in row  | 65.0 %  | 10.0 %     | 25.0 %                       | 100.0 % |
| 5.           | Observed  | 19      | 0          | 1                            | 20      |
|              | % in row  | 95.0 %  | 0.0 %      | 5.0 %                        | 100.0 % |
| Total        | Observed  | 73      | 14         | 13                           | 100     |
|              | % in row  | 73.0 %  | 14.0 %     | 13.0 %                       | 100.0 % |

**Table S2.** Comparison of time frames between single catheter groups and control group.

|                  | Single catheter groups.<br>(groups 1-4) N=80 | Control group<br>N=20 | p value            |
|------------------|----------------------------------------------|-----------------------|--------------------|
| T2 [s]           | 71 ± 54                                      | 68 ± 47               | 0.89               |
| T3 [s]           | 68 ± 69                                      | 69 ± 75               | 0.93               |
| T4 [s]           | 50 ± 35                                      | 41 ± 18               | 0.52               |
| T5 / T5a+T5b [s] | 77 ± 76                                      | 111 ± 71              | 0.008 <sup>a</sup> |
| T6 [s]           | 108 ± 90                                     | 79 ± 45               | 0.087              |
| T7 [s]           | 374 ± 189                                    | 367 ± 123             | 0.705              |
| T2+T3+T5 [s]     | 216 ± 142                                    | 248 ± 125             | 0.18               |

<sup>a</sup>U-Mann-Whitney test.

**Table S3.** Comparison of time frames in each group.

|                | Group 1   | Group 2   | Group 3   | Group 4   | Group 5   | p value            |
|----------------|-----------|-----------|-----------|-----------|-----------|--------------------|
| T2 [s]         | 70 ± 49   | 46 ± 35   | 65 ± 56   | 104 ± 63  | 68 ± 47   | 0.005 <sup>a</sup> |
| T3 [s]         | 52 ± 72   | 46 ± 32   | 748 ± 56  | 99 ± 94   | 69 ± 75   | 0.11               |
| T4 [s]         | 48 ± 24   | 53 ± 40   | 56 ± 54   | 43 ± 19   | 41 ± 18   | 0.90               |
| T5/T5a+T5b [s] | 67 ± 73   | 66 ± 67   | 91 ± 76   | 85 ± 90   | 111 ± 71  | 0.055 <sup>b</sup> |
| T6 [s]         | 121 ± 63  | 95 ± 71   | 96 ± 56   | 119 ± 58  | 79 ± 45   | 0.11               |
| T7 [s]         | 358 ± 174 | 306 ± 149 | 381 ± 201 | 448 ± 211 | 367 ± 123 | 0.15               |
| T2+T3+T5 [s]   | 190 ± 148 | 158 ± 80  | 230 ± 136 | 287 ± 164 | 248 ± 125 | 0.017 <sup>c</sup> |

<sup>a</sup>Kruskal-Wallis One-Way ANOVA (significant difference in group 2 vs. 4;  $p = 0.001$ ); <sup>b</sup>Kruskal-Wallis One-Way ANOVA (significant difference in group 2 vs. 5;  $p = 0.023$ ); <sup>c</sup>Kruskal-Wallis One-Way ANOVA (significant difference in group 2 vs 4;  $p = 0.026$ ).
